# Supplementary material
Source: PubMed Central journal article supplement (PMC7612613)
Supplement: EMS144092-supplement-Appendix.pdf [file EMS144092-supplement-Appendix.pdf]

**Appendix 1: Life expectancy trends and 95% confidence intervals, by HIV status, sex and period**

| HIV status and sex  | Period    | Life expectancy (years) (95%CI) |
|---------------------|-----------|---------------------------------|
| <b>All</b>          |           |                                 |
| Female              | 1991-1993 | 39.3 (35.9-42.8)                |
| Female              | 1994-1996 | 40.9 (37.5-44.5)                |
| Female              | 1997-1999 | 42.3 (39.1-46.2)                |
| Female              | 2000-2002 | 44.0 (41.4-46.9)                |
| Female              | 2003-2005 | 49.7 (47.0-52.6)                |
| Female              | 2006-2008 | 53.1 (50.2-56.2)                |
| Female              | 2009-2012 | 56.1 (54.0-58.5)                |
| Male                | 1991-1993 | 38.6 (35.4-42.1)                |
| Male                | 1994-1996 | 39.0 (35.6-42.6)                |
| Male                | 1997-1999 | 44.6 (40.8-48.4)                |
| Male                | 2000-2002 | 43.0 (40.4-45.8)                |
| Male                | 2003-2005 | 47.6 (44.9-50.7)                |
| Male                | 2006-2008 | 48.0 (45.4-50.6)                |
| Male                | 2009-2012 | 51.4 (49.2-53.7)                |
| <b>HIV negative</b> |           |                                 |
| Female              | 1991-1993 | 55.4 (51.7-59.4)                |
| Female              | 1994-1996 | 56.1 (52.6-59.5)                |
| Female              | 1997-1999 | 56.0 (51.9-60.8)                |
| Female              | 2000-2002 | 57.1 (54.3-60.3)                |
| Female              | 2003-2005 | 57.1 (54.3-60.1)                |
| Female              | 2006-2008 | 59.8 (56.7-63.0)                |
| Female              | 2009-2012 | 62.1 (59.8-64.4)                |
| Male                | 1991-1993 | 54.6 (50.2-59.1)                |
| Male                | 1994-1996 | 52.2 (48.2-56.4)                |
| Male                | 1997-1999 | 55.0 (50.7-59.4)                |
| Male                | 2000-2002 | 54.0 (50.7-57.3)                |
| Male                | 2003-2005 | 54.9 (51.6-58.0)                |
| Male                | 2006-2008 | 54.2 (51.3-57.2)                |
| Male                | 2009-2012 | 54.2 (51.9-56.8)                |
| <b>HIV positive</b> |           |                                 |
| Female              | 1991-1993 | 9.9 (1.8 -14.7)                 |
| Female              | 1994-1996 | 0.6 (0.4 -16.9)                 |
| Female              | 1997-1999 | 7.5 (0.7 -17.4)                 |
| Female              | 2000-2002 | 13.0 (10.9-15.4)                |
| Female              | 2003-2005 | 19.3 (14.2-25.4)                |
| Female              | 2006-2008 | 28.9 (22.4-37.3)                |
| Female              | 2009-2012 | 35.9 (30.8-46.0)                |
| Male                | 1991-1993 | 14.2 (6.0 -20.2)                |
| Male                | 1994-1996 | 10.7 (4.3 -17.9)                |
| Male                | 1997-1999 | 17.4 (8.1 -25.0)                |
| Male                | 2000-2002 | 14.3 (6.6 -20.6)                |
| Male                | 2003-2005 | 12.7 (5.1 -22.5)                |
| Male                | 2006-2008 | 26.1 (17.1-34.0)                |
| Male                | 2009-2012 | 34.3 (18.3-47.3)                |

| <b>HIV status unknown</b>                          |           |                  |
|----------------------------------------------------|-----------|------------------|
| Female                                             | 1991-1993 | 30.1 (23.6-38.3) |
| Female                                             | 1994-1996 | 28.8 (22.1-37.7) |
| Female                                             | 1997-1999 | 27.6 (21.8-35.5) |
| Female                                             | 2000-2002 | 42.8 (36.3-50.0) |
| Female                                             | 2003-2005 | 44.1 (36.8-54.8) |
| Female                                             | 2006-2008 | 44.0 (36.9-52.7) |
| Female                                             | 2009-2012 | 44.7 (37.3-53.3) |
| Male                                               | 1991-1993 | 31.9 (27.0-39.4) |
| Male                                               | 1994-1996 | 40.0 (30.8-50.0) |
| Male                                               | 1997-1999 | 40.0 (30.7-50.9) |
| Male                                               | 2000-2002 | 48.7 (42.4-55.9) |
| Male                                               | 2003-2005 | 47.7 (41.8-55.0) |
| Male                                               | 2006-2008 | 44.2 (38.6-50.5) |
| Male                                               | 2009-2012 | 47.3 (42.2-52.6) |
| <b>Life expectancy deficit associated with HIV</b> |           |                  |
| Female                                             | 1991-1993 | 16.1 (12.7-19.8) |
| Female                                             | 1994-1996 | 15.2 (11.9-18.7) |
| Female                                             | 1997-1999 | 13.7 (9.9 -18.4) |
| Female                                             | 2000-2002 | 13.1 (10.3-15.9) |
| Female                                             | 2003-2005 | 7.4 (5.3 -9.7 )  |
| Female                                             | 2006-2008 | 6.7 (4.1 -8.9 )  |
| Female                                             | 2009-2012 | 6.0 (4.1 -7.8 )  |
| Male                                               | 1991-1993 | 16.0 (12.1-19.9) |
| Male                                               | 1994-1996 | 13.2 (9.5 -16.8) |
| Male                                               | 1997-1999 | 10.4 (6.8 -14.1) |
| Male                                               | 2000-2002 | 11.0 (8.2 -14.2) |
| Male                                               | 2003-2005 | 7.2 (4.7 -10.0)  |
| Male                                               | 2006-2008 | 6.2 (4.0 -8.7 )  |
| Male                                               | 2009-2012 | 2.8 (1.2 -4.6 )  |
